# Supplementary material for: Preventive small-quantity lipid-based nutrient supplements reduce severe wasting and severe stunting among young children: an individual participant data meta-analysis of randomized controlled trials
Source: bioRxiv or medRxiv preprint supplement (doi:10.1101/2022.06.16.22276521), 2022-06-17

# Supplemental figure 9: Forest plots for effects of SQ-LNS on severe stunting stratified by study-level effect modifiers

## Contents

|                                                                |          |
|----------------------------------------------------------------|----------|
| <b>Supplemental figure 9: Severe stunting prevalence ratio</b> | <b>2</b> |
| 9A: Stratified by Geographic region . . . . .                  | 2        |
| 9B: Stratified by Stunting burden . . . . .                    | 3        |
| 9C: Stratified by Wasting burden . . . . .                     | 4        |
| 9D: Stratified by Malaria prevalence . . . . .                 | 5        |
| 9E: Stratified by Source water quality . . . . .               | 6        |
| 9F: Stratified by Sanitation . . . . .                         | 7        |
| 9G: Stratified by Supplement duration . . . . .                | 8        |
| 9H: Stratified by Frequency of contact . . . . .               | 9        |
| 9I: Stratified by Average SQ-LNS compliance . . . . .          | 10       |

These figures are forest plots showing the study-level effect modification of intervention effects. Each figure shows the study-level estimates along with the corresponding pooled estimate grouped by study-level effect modifier category. Individual study estimates were generated from log-binomial regression; controlling for baseline measure when available and with clustered observations using robust standard errors for cluster-randomized trials. Pooled sub-group estimates were generated using inverse-variance weighting random effects. P-value for the difference was estimated using random effects meta-regression with the indicated effect modifier as the predictor of intervention effect size; stratified pooled estimates are presented for each strata.

The labels on the left y-axis correspond to trial level information. The values on the right indicate the study level effect estimate, confidence interval, and weighting for deriving the pooled estimates.

## Supplemental figure 9: Severe stunting prevalence ratio

### 9A: Stratified by Geographic region

#### Geographic region

( $p$ -diff = 0.970)

#### Geographic region – SEAR

| Country    | Trial         | N           | N           | PR<br>(95% CI)           | W    |
|------------|---------------|-------------|-------------|--------------------------|------|
| Bangladesh | JiVitA-4 (42) | 2838        | 1244        | 0.95 (0.78, 1.17)        | 0.37 |
| Bangladesh | RDNS (43)     | 1663        | 815         | 0.89 (0.67, 1.20)        | 0.27 |
| Bangladesh | WASH-B (44)   | 1158        | 3431        | 0.71 (0.58, 0.87)        | 0.37 |
|            |               | <b>5659</b> | <b>5490</b> | <b>0.84 (0.70, 1.01)</b> |      |

$I^2 = 0.52$ ,  $Tau^2 = 0.01$

#### Geographic region – AFR

|              |                   |              |              |                          |      |
|--------------|-------------------|--------------|--------------|--------------------------|------|
| Burkina Faso | iLiNS-Zinc (45)   | 1952         | 664          | 0.48 (0.38, 0.60)        | 0.13 |
| Burkina Faso | PROMIS (46)       | 863          | 914          | 0.96 (0.63, 1.47)        | 0.06 |
| Burkina Faso | PROMIS CS (46)    | 430          | 439          | 0.88 (0.42, 1.82)        | 0.03 |
| Ghana        | GHANA (47)        | 98           | 96           | 0.98 (0.06, 15.43)       | 0.00 |
| Ghana        | iLiNS-DYAD-G (48) | 347          | 692          | 1.71 (0.58, 5.05)        | 0.01 |
| Kenya        | WASH-B (50)       | 1457         | 5137         | 0.82 (0.67, 1.01)        | 0.14 |
| Madagascar   | MAHAY (51)        | 1702         | 1682         | 1.01 (0.85, 1.21)        | 0.15 |
| Malawi       | iLiNS-DYAD-M (52) | 220          | 444          | 0.90 (0.55, 1.47)        | 0.05 |
| Malawi       | iLiNS-DOSE (53)   | 696          | 241          | 0.97 (0.70, 1.35)        | 0.09 |
| Mali         | PROMIS (54)       | 506          | 506          | 0.97 (0.64, 1.47)        | 0.07 |
| Mali         | PROMIS CS (54)    | 952          | 969          | 0.73 (0.51, 1.06)        | 0.08 |
| Zimbabwe     | SHINE (HIV-) (55) | 1880         | 1794         | 0.82 (0.65, 1.04)        | 0.13 |
| Zimbabwe     | SHINE (HIV+) (56) | 337          | 330          | 0.89 (0.60, 1.30)        | 0.07 |
|              |                   | <b>11440</b> | <b>13908</b> | <b>0.83 (0.73, 0.96)</b> |      |

$I^2 = 0.61$ ,  $Tau^2 = 0.03$

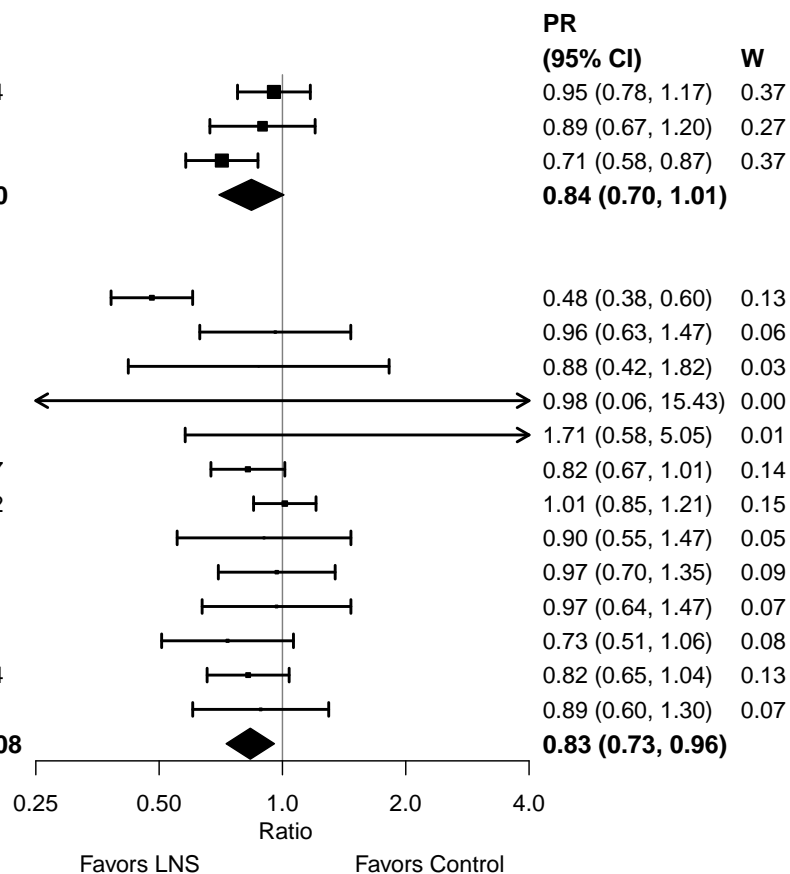

Supplemental figure 9: Severe stunting prevalence ratio

9B: Stratified by Stunting burden

**Stunting burden**

(p-diff = 0.309)

**Stunting burden – Less than 35%**

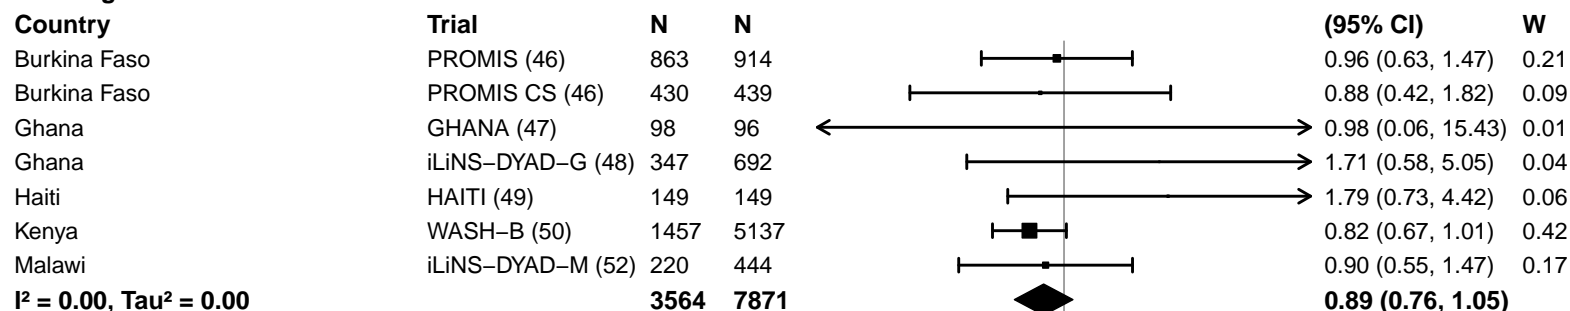

**Stunting burden – More than 35%**

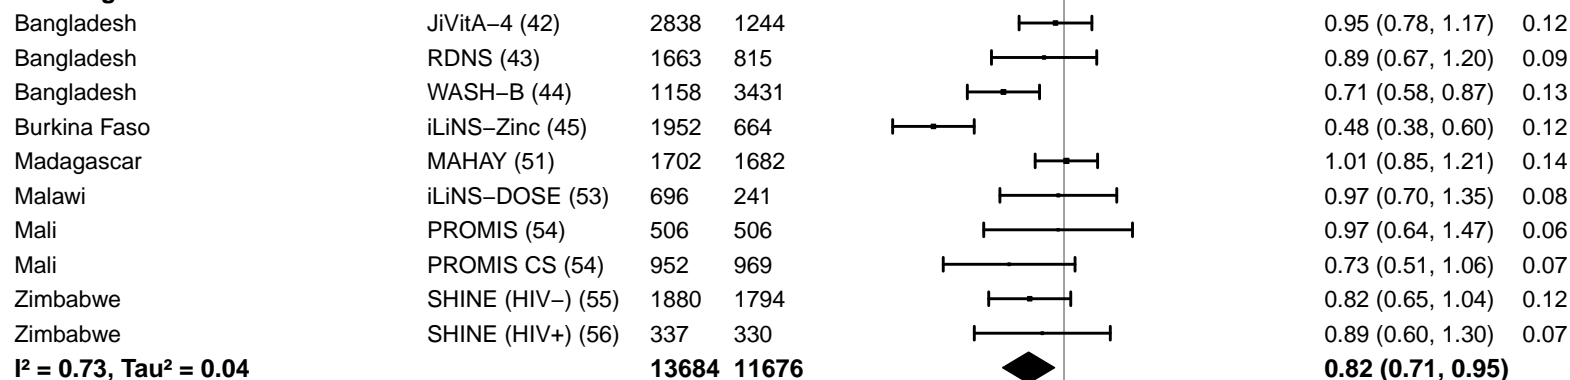

0.25 0.50 1.0 2.0 4.0  
Ratio  
Favors LNS Favors Control

Supplemental figure 9: Severe stunting prevalence ratio

9C: Stratified by Wasting burden

**Wasting burden**

(p-diff = 0.123)

**Wasting burden – Wasting < 10%**

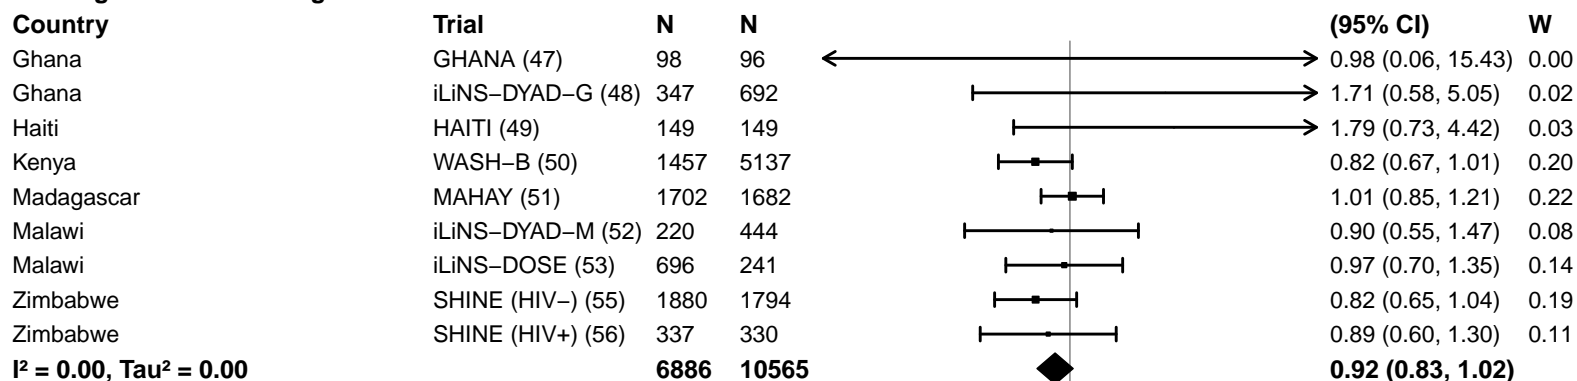

**Wasting burden – Wasting >= 10%**

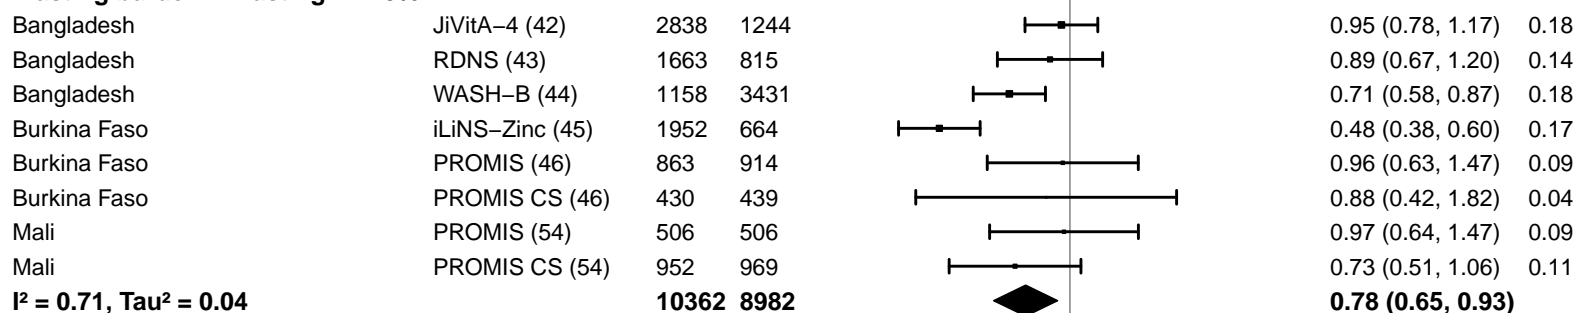

Supplemental figure 9: Severe stunting prevalence ratio

9D: Stratified by Malaria prevalence

**Malaria prevalence**

(p-diff = 0.407)

**Malaria prevalence – Less than 10%**

| Country                                             | Trial             | N            | N            | PR<br>(95% CI)           | W    |
|-----------------------------------------------------|-------------------|--------------|--------------|--------------------------|------|
| Bangladesh                                          | JiVitA-4 (42)     | 2838         | 1244         | 0.95 (0.78, 1.17)        | 0.15 |
| Bangladesh                                          | RDNS (43)         | 1663         | 815          | 0.89 (0.67, 1.20)        | 0.12 |
| Bangladesh                                          | WASH-B (44)       | 1158         | 3431         | 0.71 (0.58, 0.87)        | 0.16 |
| Haiti                                               | HAITI (49)        | 149          | 149          | 1.79 (0.73, 4.42)        | 0.02 |
| Kenya                                               | WASH-B (50)       | 1457         | 5137         | 0.82 (0.67, 1.01)        | 0.15 |
| Madagascar                                          | MAHAY (51)        | 1702         | 1682         | 1.01 (0.85, 1.21)        | 0.17 |
| Zimbabwe                                            | SHINE (HIV-) (55) | 1880         | 1794         | 0.82 (0.65, 1.04)        | 0.14 |
| Zimbabwe                                            | SHINE (HIV+) (56) | 337          | 330          | 0.89 (0.60, 1.30)        | 0.09 |
| <b>I<sup>2</sup> = 0.33, Tau<sup>2</sup> = 0.01</b> |                   | <b>11184</b> | <b>14582</b> | <b>0.88 (0.79, 0.98)</b> |      |

**Malaria prevalence – At least 10%**

|                                                     |                   |             |             |                          |      |
|-----------------------------------------------------|-------------------|-------------|-------------|--------------------------|------|
| Burkina Faso                                        | iLiNS-Zinc (45)   | 1952        | 664         | 0.48 (0.38, 0.60)        | 0.24 |
| Burkina Faso                                        | PROMIS (46)       | 863         | 914         | 0.96 (0.63, 1.47)        | 0.13 |
| Burkina Faso                                        | PROMIS CS (46)    | 430         | 439         | 0.88 (0.42, 1.82)        | 0.05 |
| Ghana                                               | GHANA (47)        | 98          | 96          | 0.98 (0.06, 15.43)       | 0.00 |
| Ghana                                               | iLiNS-DYAD-G (48) | 347         | 692         | 1.71 (0.58, 5.05)        | 0.03 |
| Malawi                                              | iLiNS-DYAD-M (52) | 220         | 444         | 0.90 (0.55, 1.47)        | 0.10 |
| Malawi                                              | iLiNS-DOSE (53)   | 696         | 241         | 0.97 (0.70, 1.35)        | 0.17 |
| Mali                                                | PROMIS (54)       | 506         | 506         | 0.97 (0.64, 1.47)        | 0.13 |
| Mali                                                | PROMIS CS (54)    | 952         | 969         | 0.73 (0.51, 1.06)        | 0.15 |
| <b>I<sup>2</sup> = 0.64, Tau<sup>2</sup> = 0.04</b> |                   | <b>6064</b> | <b>4965</b> | <b>0.81 (0.65, 0.99)</b> |      |

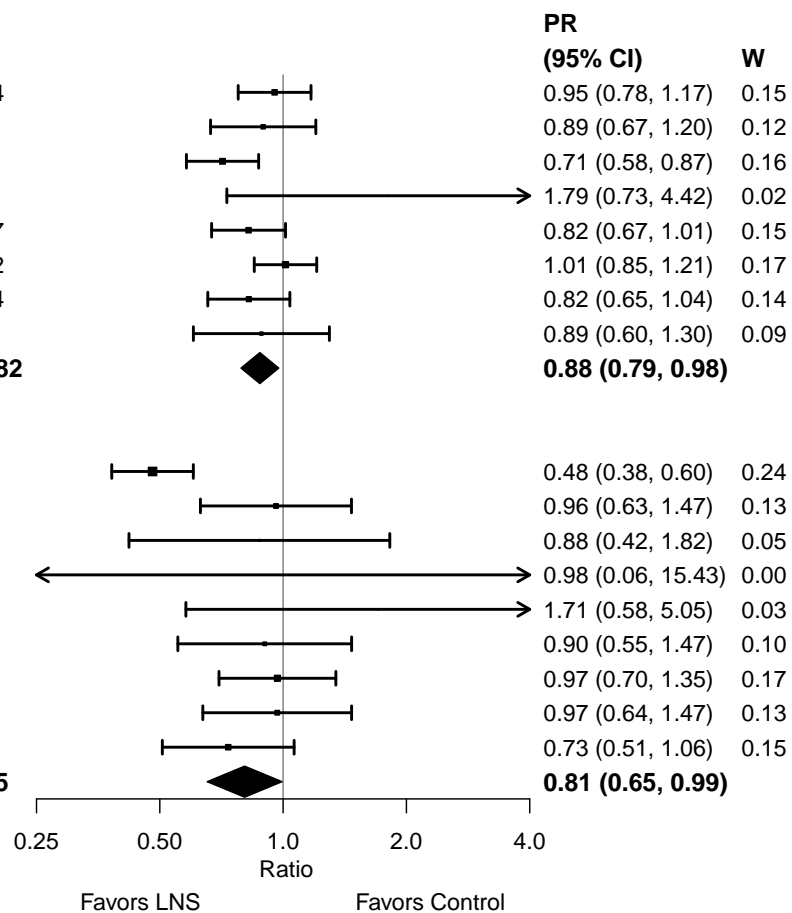

Supplemental figure 9: Severe stunting prevalence ratio

9E: Stratified by Source water quality

**Source water quality**

(p-diff = 0.369)

**Source water quality – Improved**

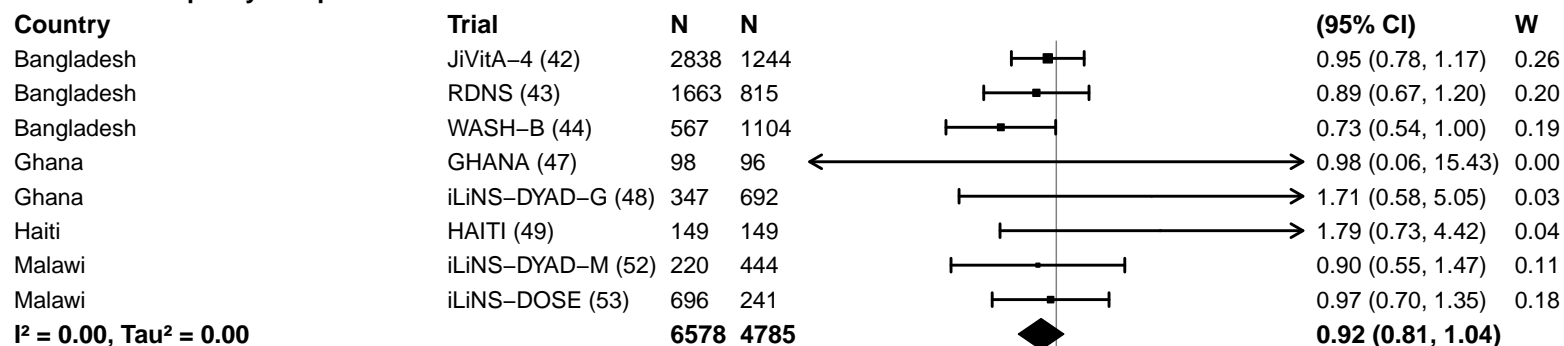

**Source water quality – Unimproved**

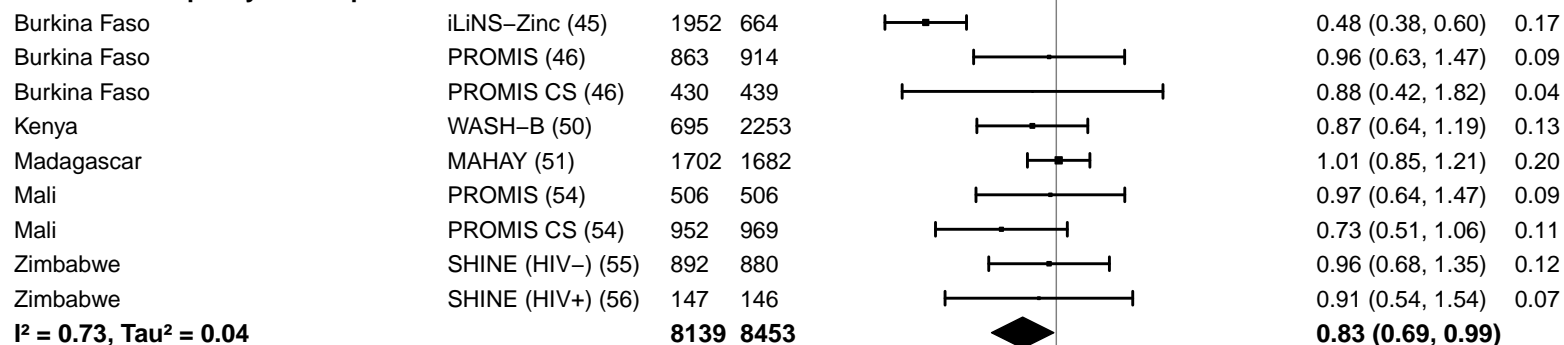

Supplemental figure 9: Severe stunting prevalence ratio

9F: Stratified by Sanitation

**Sanitation**  
(p-diff = 0.533)

**Sanitation – Improved**

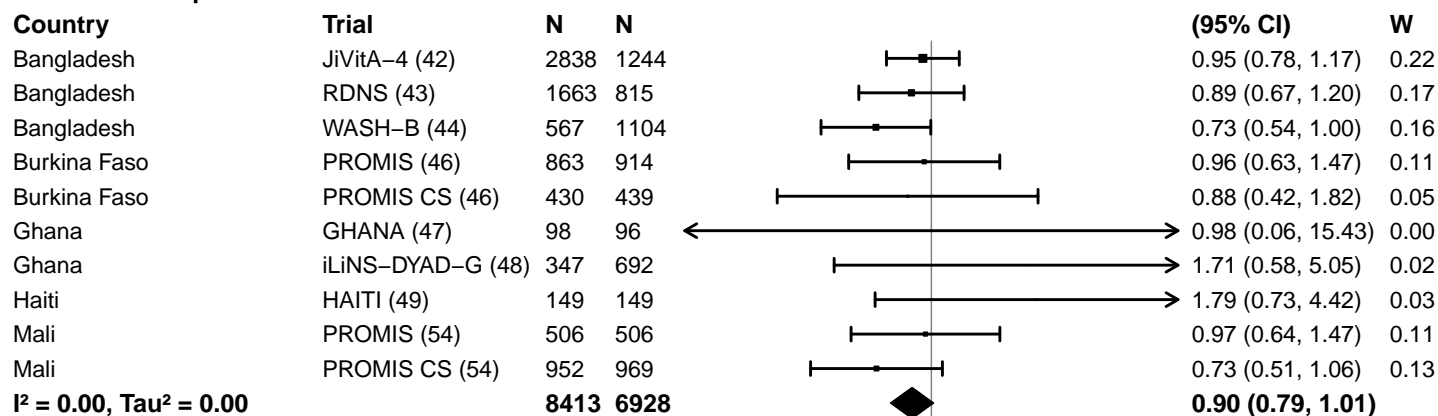

**Sanitation – Unimproved**

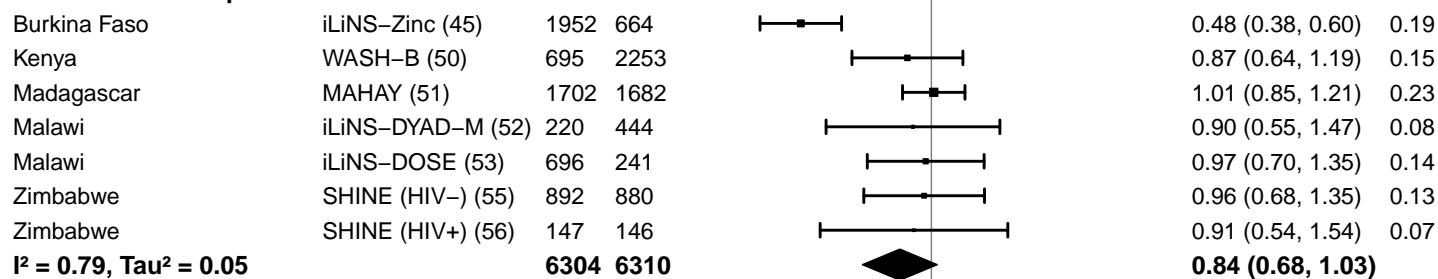

0.25 0.50 1.0 2.0 4.0  
Ratio  
Favors LNS Favors Control

Supplemental figure 9: Severe stunting prevalence ratio

9G: Stratified by Supplement duration

**Supplement duration**

(p-diff = 0.572)

**Supplement duration – 12m or less**

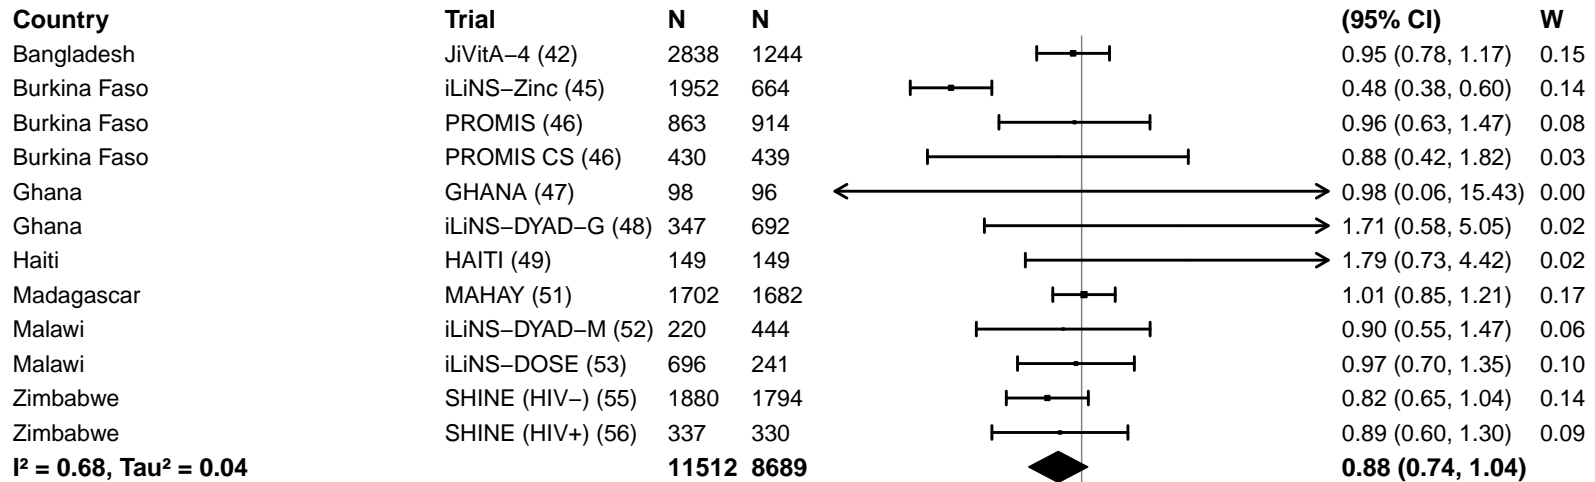

**Supplement duration – > 12m**

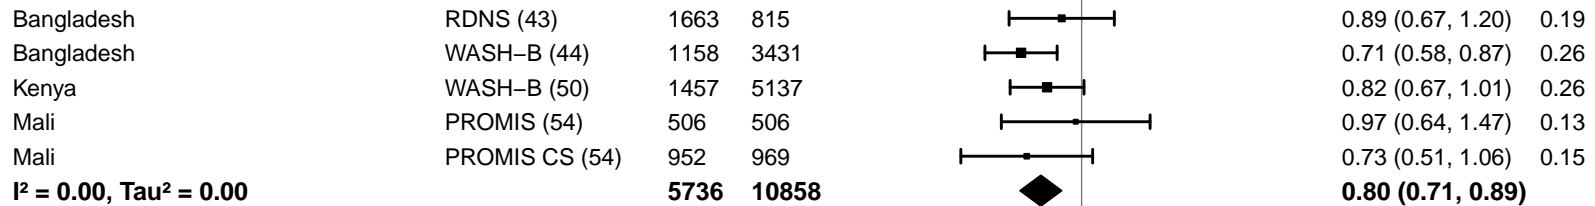

0.25 0.50 1.0 2.0 4.0  
Ratio  
Favors LNS Favors Control



Supplemental figure 9: Severe stunting prevalence ratio

9H: Stratified by Frequency of contact

Frequency of contact  
(p-diff = 0.220)

Frequency of contact – Monthly

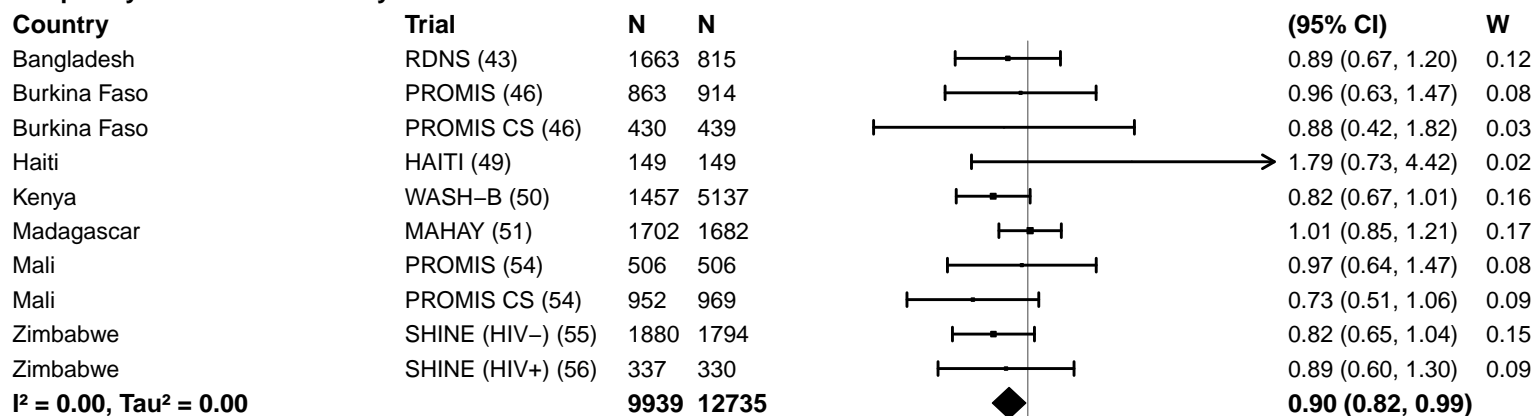

Frequency of contact – Weekly

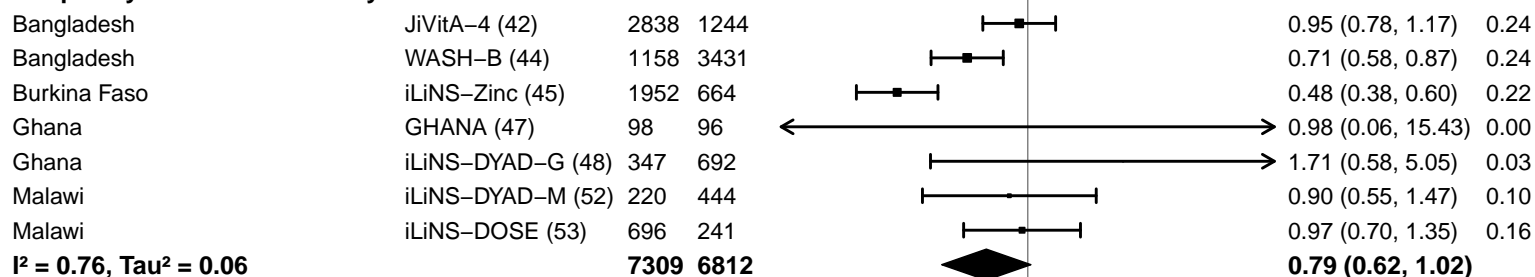

0.25 0.50 1.0 2.0 4.0  
Ratio  
Favors LNS Favors Control

Supplemental figure 9: Severe stunting prevalence ratio

9I: Stratified by Average SQ-LNS compliance

**Average SQ-LNS compliance**

(p-diff = 0.251)

**Average SQ-LNS compliance – Low**

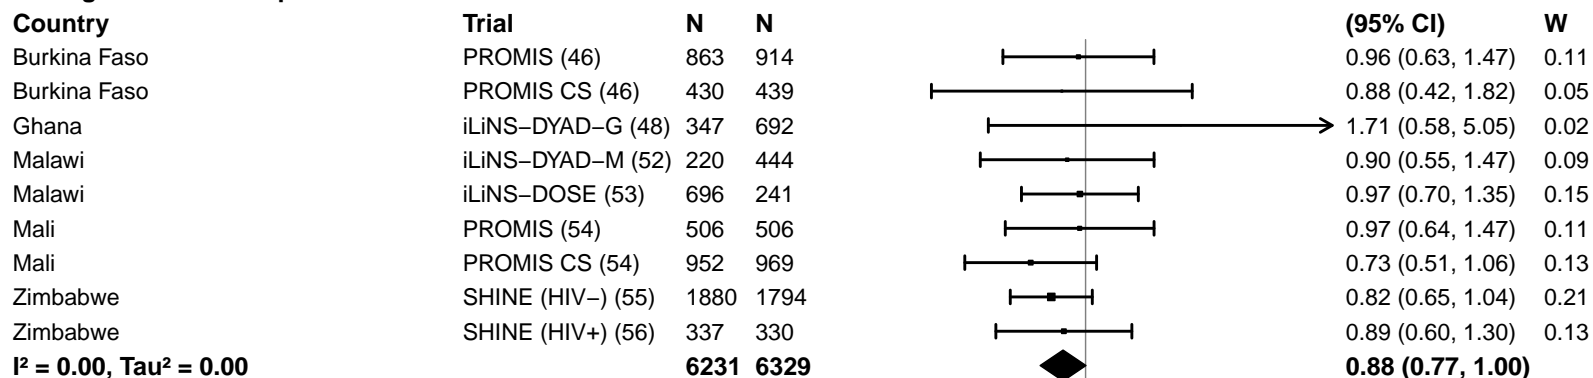

**Average SQ-LNS compliance – High**

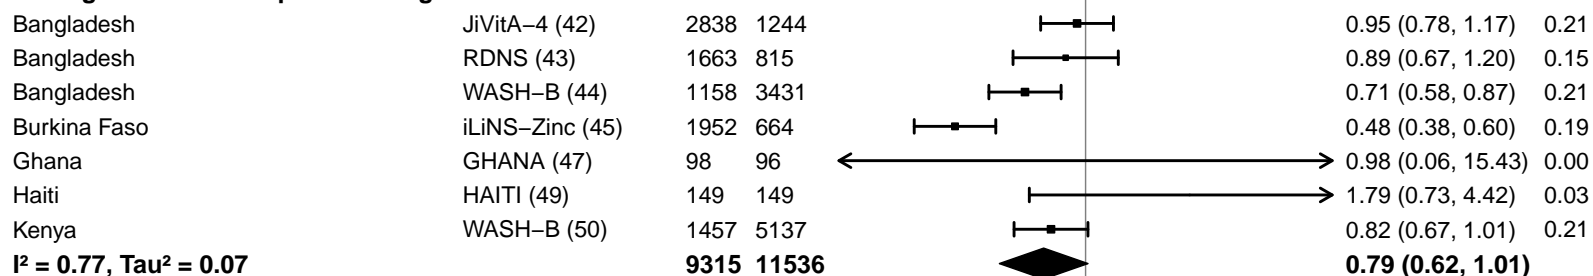

Supplement: Supplementary file [file media-12.pdf]
