# Supplementary material for: Preventive small-quantity lipid-based nutrient supplements reduce severe wasting and severe stunting among young children: an individual participant data meta-analysis of randomized controlled trials
Source: bioRxiv or medRxiv preprint supplement (doi:10.1101/2022.06.16.22276521), 2022-06-17

Supplemental Figure 1: Study flow diagram

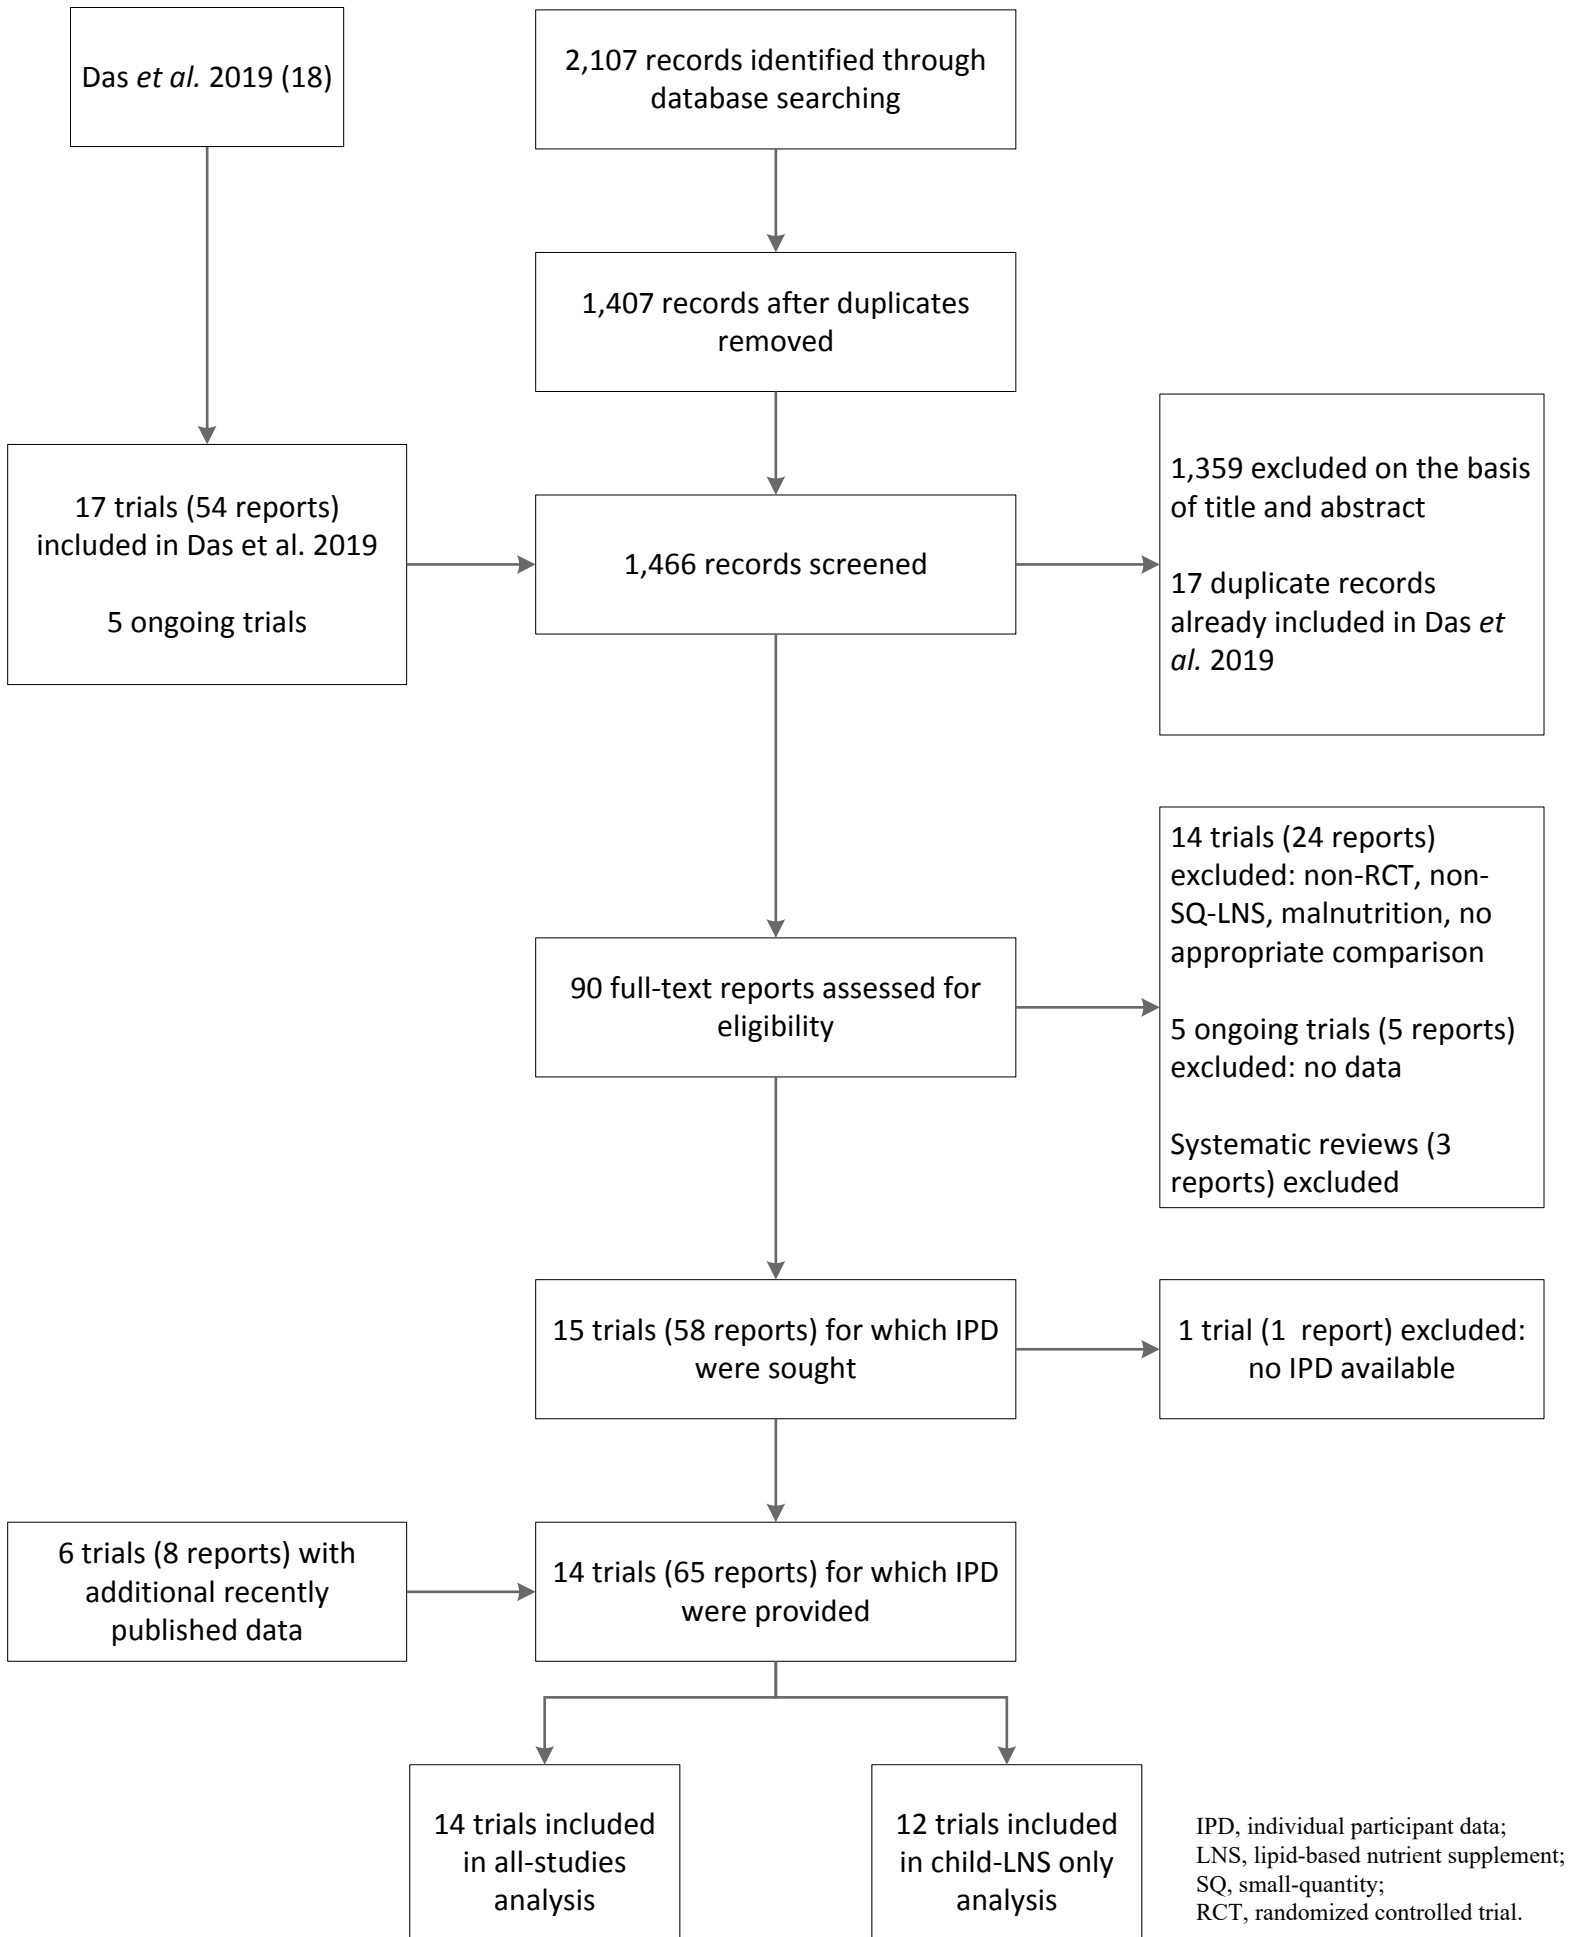

Supplement: Supplementary file [file media-4.pdf]
