# Supplementary material for: Preventive small-quantity lipid-based nutrient supplements reduce severe wasting and severe stunting among young children: an individual participant data meta-analysis of randomized controlled trials
Source: bioRxiv or medRxiv preprint supplement (doi:10.1101/2022.06.16.22276521), 2022-06-17
Supplement: Supplementary file [file media-9.pdf]

Supplemental Figure 6: Sensitivity analyses of main effects of SQ-LNS on prevalence ratios for very low MUAC

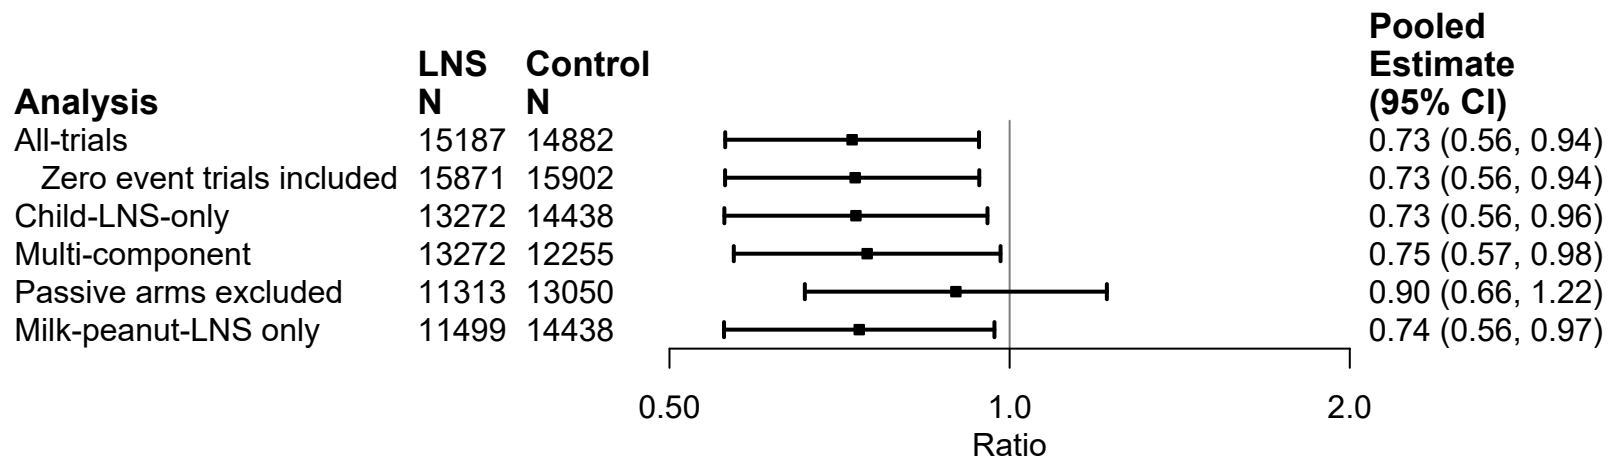

All-trial analysis includes all trials;

Child-LNS-only excludes trial arms that provided both maternal and child LNS;

Multi-component analysis separates comparisons within trials that included multi-component interventions, so that the SQ-LNS vs. no SQ-LNS comparisons were conducted separately between pairs of arms that included the same non-nutrition components (e.g. SQ-LNS+WASH vs. WASH; SQ-LNS vs. Control);

Passive arms excluded analysis excludes passive control arms;

Milk-peanut LNS only analysis excludes arms with SQ-LNS formulations that were not milk and peanut based;

“Zero events trials included” uses estimates generated for certain trials in which 0.5 is substituted for the 0 value in analysis for severe wasting.

LNS, lipid-based nutrient supplements; MUAC, mid-upper arm circumference.
