# Supplementary material for: Preventive small-quantity lipid-based nutrient supplements reduce severe wasting and severe stunting among young children: an individual participant data meta-analysis of randomized controlled trials
Source: bioRxiv or medRxiv preprint supplement (doi:10.1101/2022.06.16.22276521), 2022-06-17
Supplement: Supplementary file [file media-10.pdf]

Supplemental Figure 7: Forest plot of effect of SQ-LNS on severe wasting prevalence using the rare events sensitivity analysis, with estimates generated for certain trials in which 0.5 is substituted for the 0 value in analysis

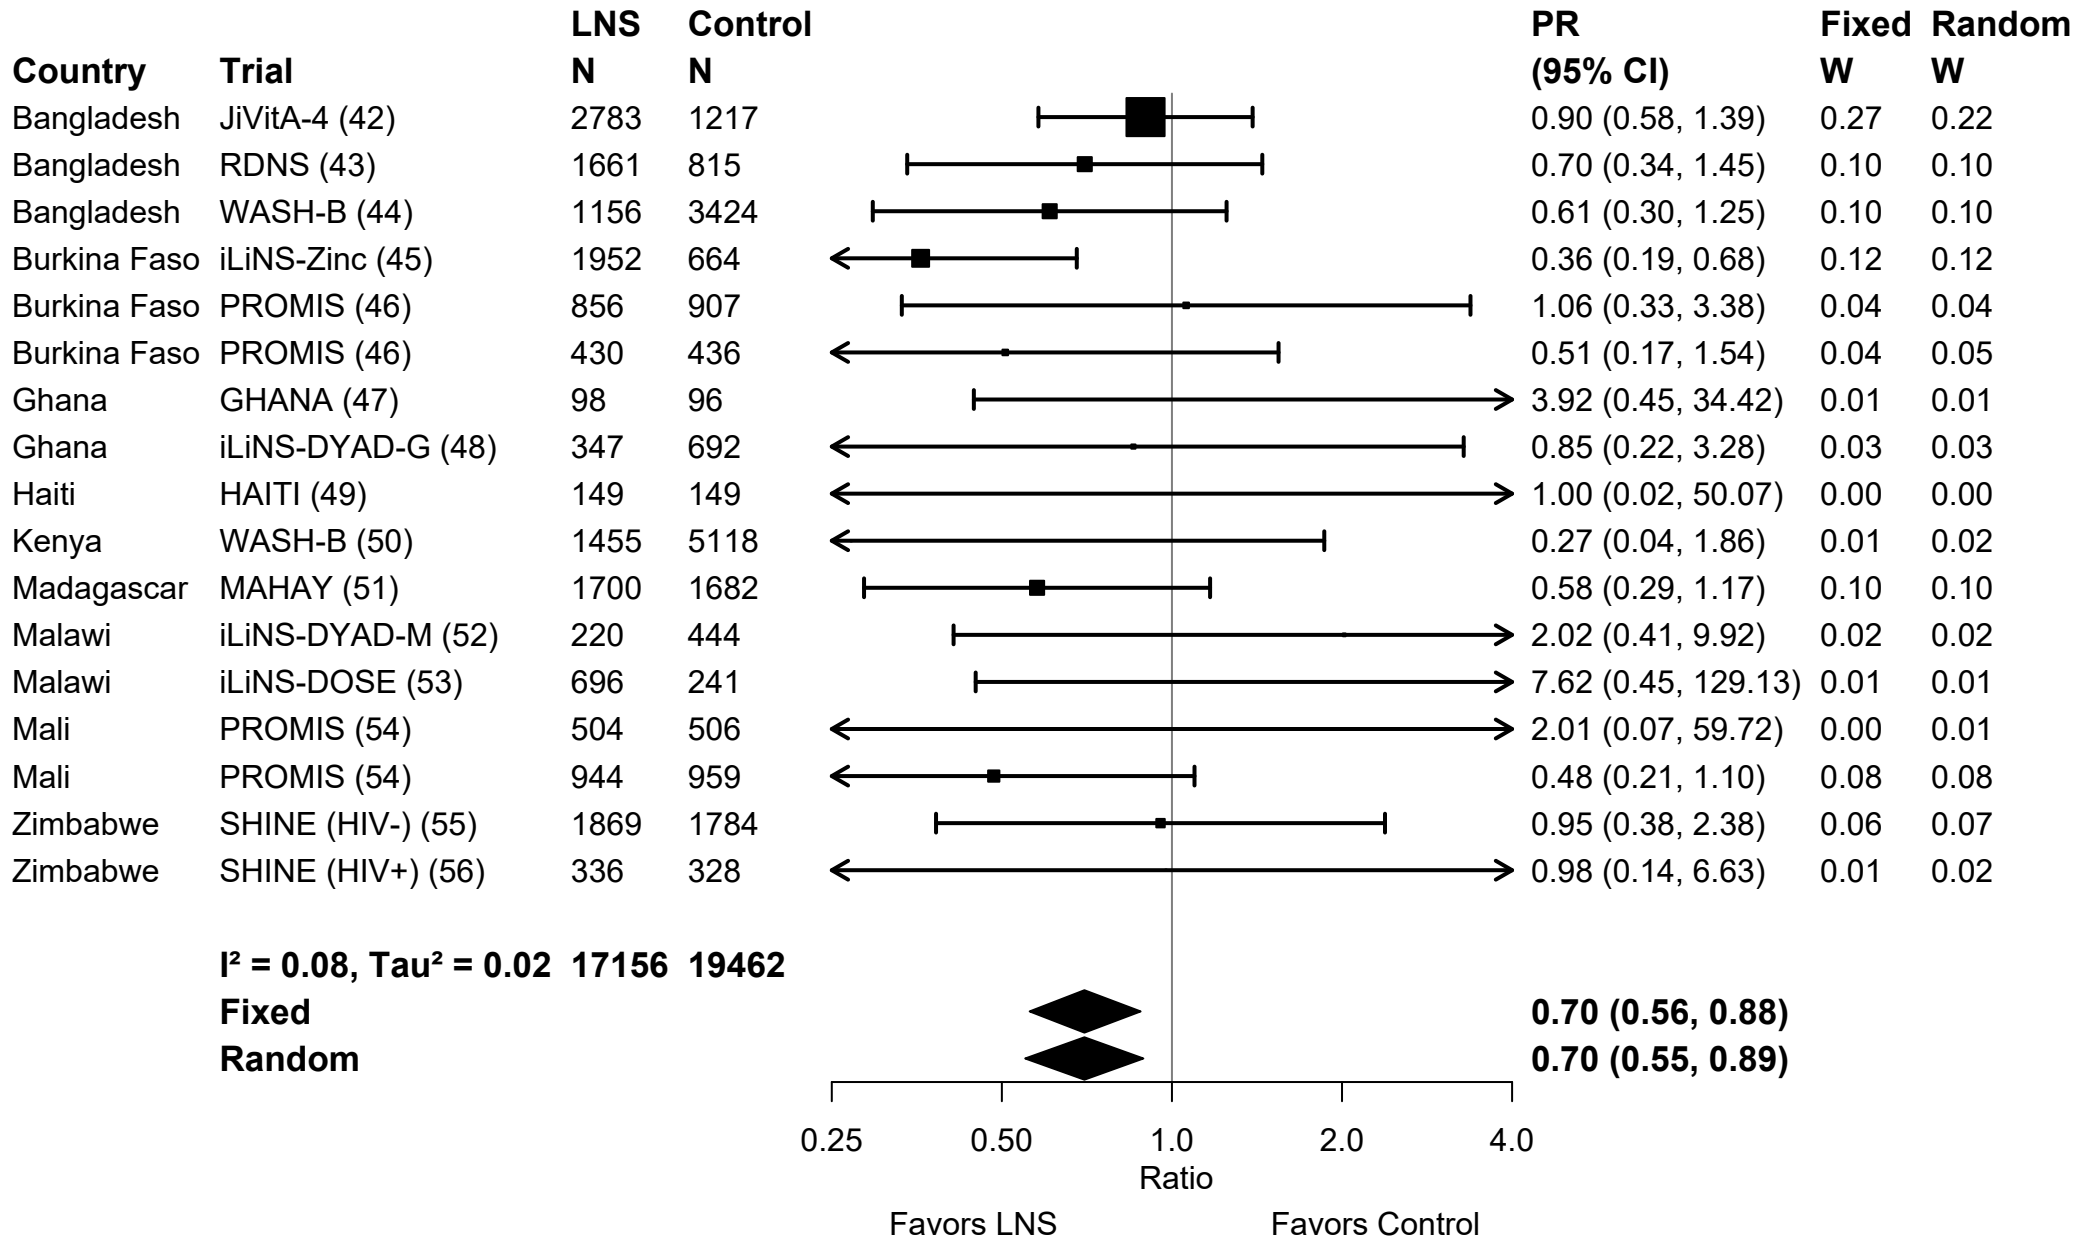

LNS, lipid-based nutrient supplements; PR, prevalence ratio.

Individual study estimates were generated from log-binomial regression controlling for baseline measure when available and with clustered observations using robust standard errors for cluster-randomized trials. Pooled estimates were generated using inverse-variance weighting with both fixed and random effects.
